# Supplementary material for: Developmental Dopamine Loss Rewires Striatal Circuits to Promote Locomotion
Source: Research Square preprint supplement (doi:10.21203/rs.3.rs-7401124/v1), 2025-09-15
Supplement: Supplementary file 1 [file 88306ca6f654931a8adbea51.docx]

**Title: Developmental Dopamine Loss Rewires Striatal Circuits to Promote Locomotion**

**Authors**: Jie Dong1,2, Breanna T. Sullivan1, Victor M. Martinez Smith1, Lupeng Wang1, Lulu Tian1,3, Justin Kung1, Bin Song1, 4, 5, Shirong Lin1, 6, 7, Andreanna Le1, Lixin Sun1, Lisa Chang1, Jinhui Ding8, Weidong Le9, Jun Jia1, 10, and Huaibin Cai1*

**Supplementary Figures and Figure Legends**

**Fig. S1. Loss of PITX3 expression in the midbrain DANs of Pitx3ak/ak mice**


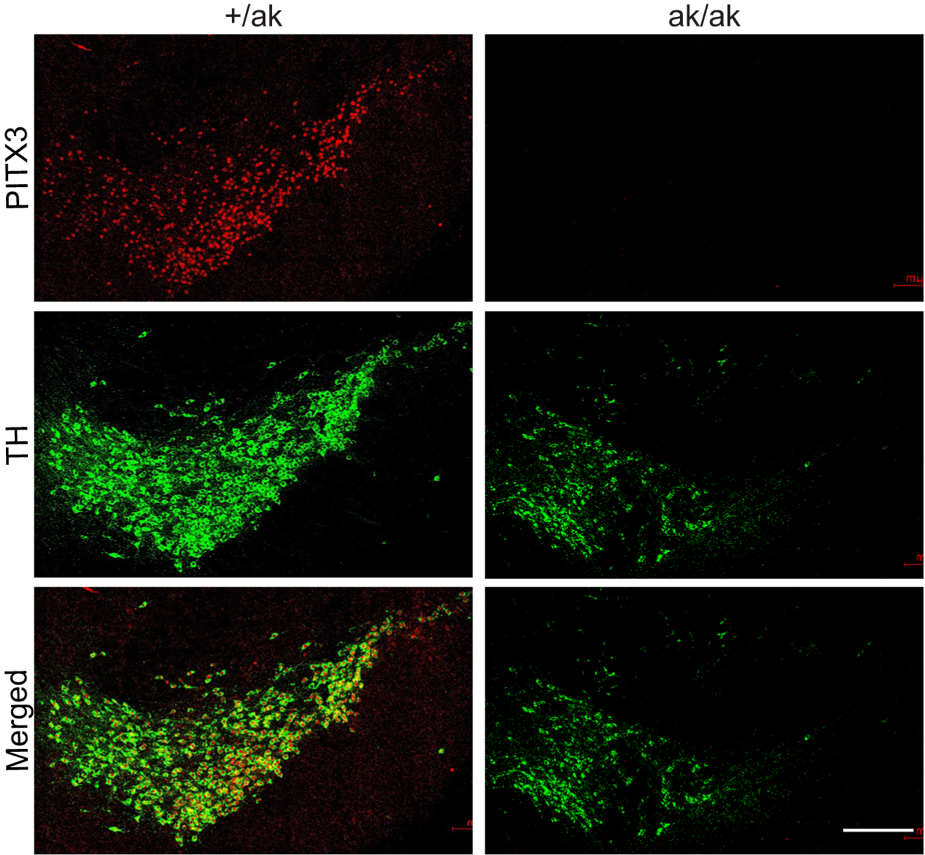


Representative images showing PITX3 (red) and TH (green) immunolabeling in the midbrain of *Pitx3*+/ak and *Pitx3*ak/ak mice. Scale bar, 200 μm.

**Fig. S2. No significant difference in the number of interneurons between Pitx3+/ak and Pitx3ak/ak mice**

**
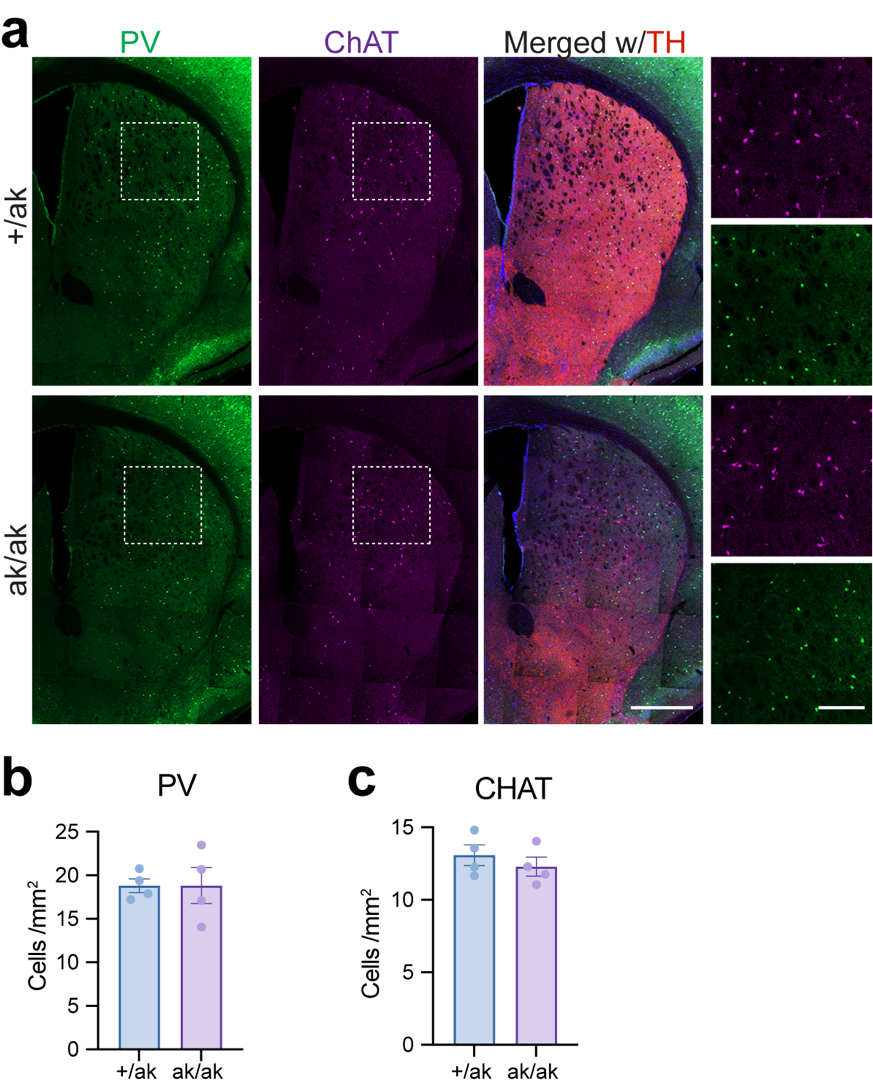
**

**a** Representative coronal images of the dorsal striatum stained for PV (green), ChAT (magenta) and TH (red) in *Pitx3*+/ak and *Pitx3*ak/ak mice. Right panels show magnified views of the dotted squares in the left panels. Scale bar: 500 μm (left) and 200 μm (right).

**b** Comparison of the PV+ cell density in the dorsal striatum between *Pitx3*+/ak and *Pitx3*ak/ak mice. Unpaired t test, n = 4 mice per each genotype, t (6) = 0.0055, p = 0.996.

**c** Comparison of the ChAT+ cell density in the dorsal striatum between *Pitx3*+/ak and *Pitx3*ak/ak mice. Unpaired t test, n = 4 mice per each genotype, t (6) = 0.8309, p = 0.438.

**Fig. S3. No apparent change of dSPN projections to the GPe of *Pitx3*ak/ak mice.**


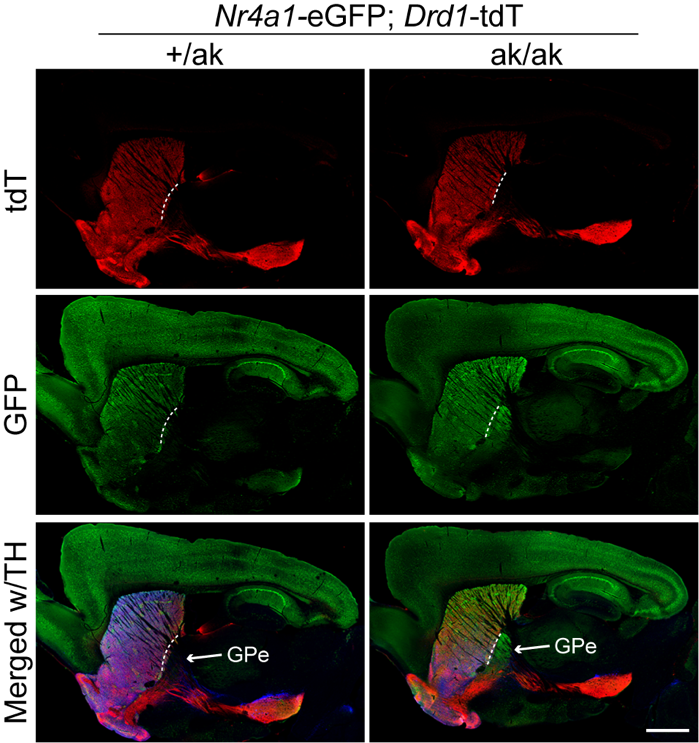


Representative sagittal sections of *Nr4a1*-eGFP; *Drd1*-tdT mice on *Pitx3*+/ak and *Pitx3*ak/ak backgrounds. Scale bar: 1000 μm
